# Supplementary material for: Valley-selective carrier transfer in SnS-based van der Waals heterostructures
Source: Royal Society of Chemistry journal article supplement (doi:10.1039/d4nh00231h), 2024-01-01
Supplement: d4nh00231h1.pdf [file d4nh00231h1.pdf]

## Supporting Information

### Valley-selective carrier transfer in SnS-based van der Waals heterostructures

E. Sutter,<sup>1,\*</sup> H.-P. Komsa,<sup>2</sup> and P. Sutter<sup>3,\*</sup>

<sup>1</sup>Department of Mechanical and Materials Engineering, University of Nebraska-Lincoln, Lincoln, NE 68588, USA

<sup>2</sup>Microelectronics Research Unit, University of Oulu, FI-90014, Oulu, Finland

<sup>3</sup>Department of Electrical and Computer Engineering, University of Nebraska-Lincoln, Lincoln, NE 68588, USA

\*Corresponding authors, email: esutter@unl.edu (E. Sutter), psutter@unl.edu (P. Sutter)

### Supporting Figures

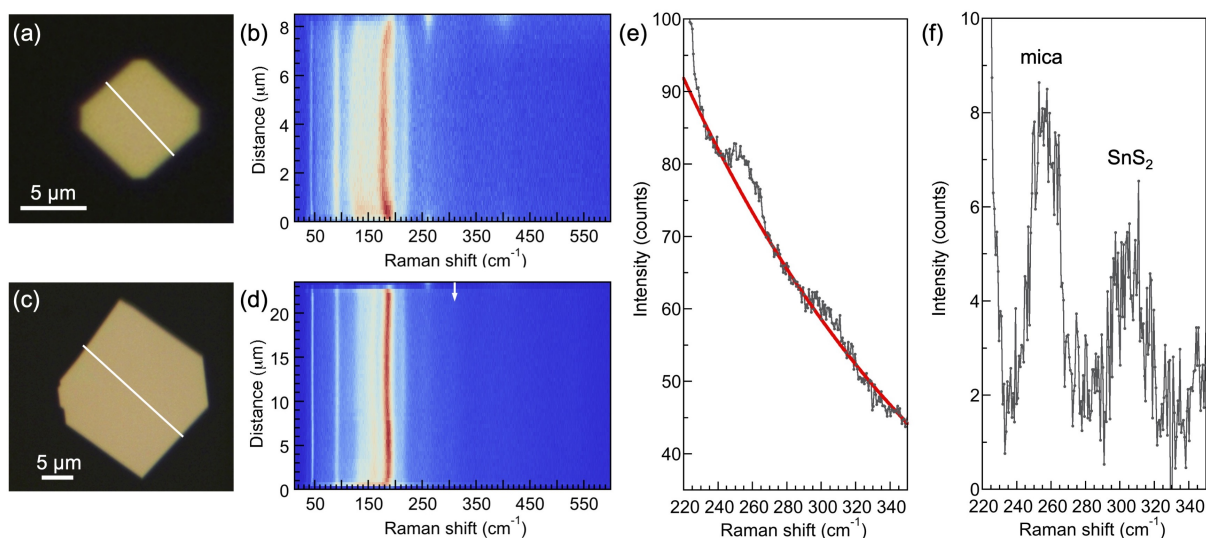

**Supporting Figure 1.** Raman spectroscopy of SnS flakes and SnS-SnS<sub>2</sub> heterostructures. **(a)** Optical microscopy of an SnS flake. **(b)** Raman linescan across the SnS flake (line in (a)), showing the characteristic Raman-active modes of SnS. **(c)** Optical microscopy of an SnS-SnS<sub>2</sub> wrap-around heterostructure, grown from SnS<sub>2</sub> precursor. **(d)** Raman linescan across the SnS-SnS<sub>2</sub> heterostructure (line in (c)). **(e)** Average of the individual Raman spectra along the linescan across the SnS-SnS<sub>2</sub> heterostructure (shown in (d)). **(f)** Average Raman spectrum across the SnS-SnS<sub>2</sub> heterostructure following background subtraction (red line in (e)). The mode at ~256 cm<sup>-1</sup> is due to residual signal from the mica substrate (also visible with higher intensity outside the SnS-SnS<sub>2</sub> flake), whereas the mode at ~306 cm<sup>-1</sup> originates from the thin SnS<sub>2</sub> shell covering the top of the flake.

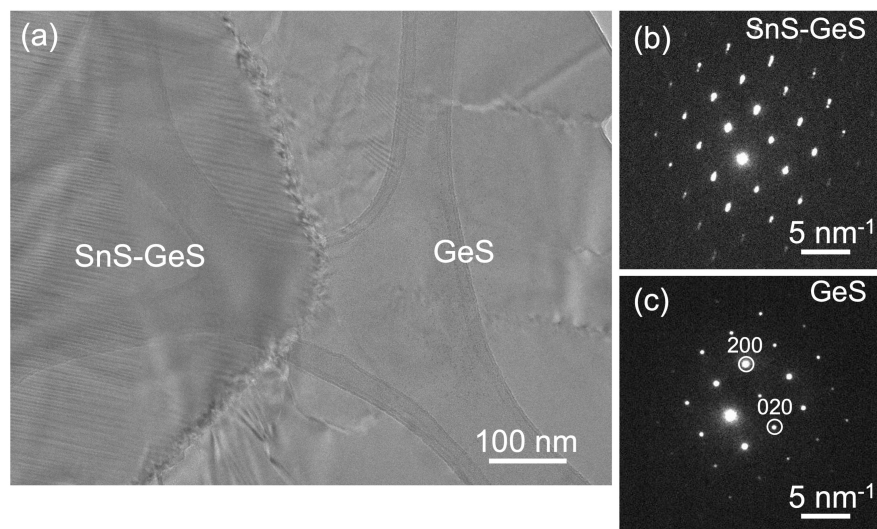

**Supporting Figure 2.** TEM imaging and nanobeam electron diffraction analysis of SnS-GeS heterostructures. **(a)** Plan-view TEM image obtained near the interface between the SnS seed covered by a thin (few-layer) GeS stack and the laterally attached GeS band (see Figure 2, main text). **(b)** Nanobeam electron diffraction pattern obtained within the SnS-GeS vertical stack, showing multiple reflections along the (100) axis, *i.e.*, the direction with substantial (~10%) in-plane lattice mismatch between SnS and GeS while no extra spots appear along the (010) axis where the mismatch is negligible. **(c)** Nanobeam electron diffraction within the laterally attached GeS edge band, showing a single-phase GeS diffraction pattern.

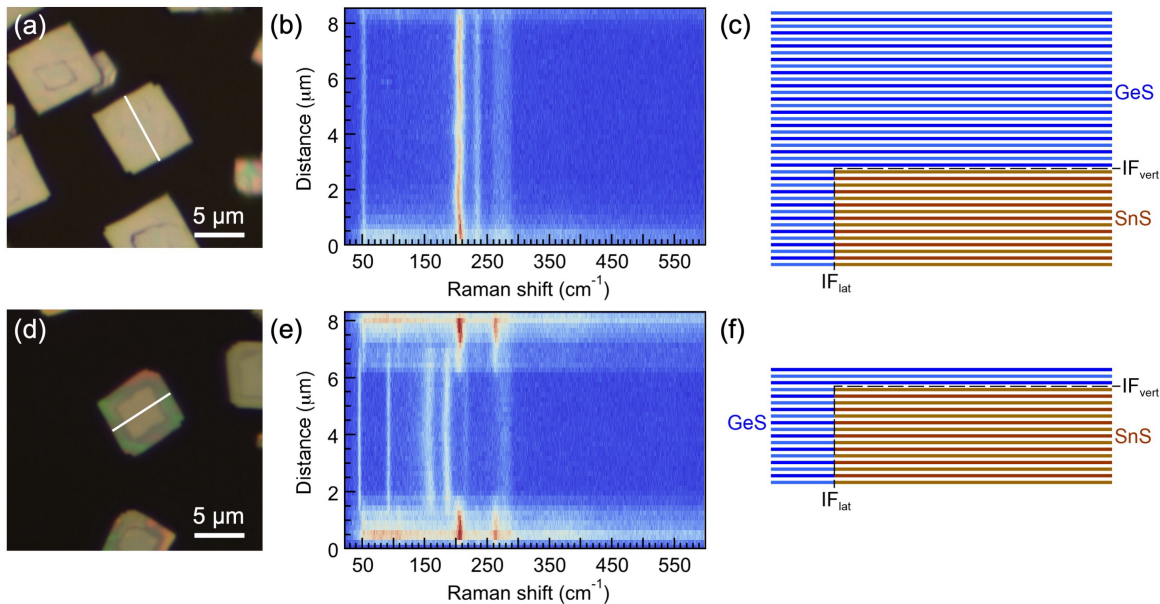

**Supporting Figure 3.** Raman spectroscopy of SnS-GeS heterostructures. **(a)** Optical microscopy of an SnS-GeS heterostructure with thick GeS coverage. **(b)** Raman linescan across the SnS flake (line in (a)), showing the characteristic Raman-active modes of SnS. **(c)** Schematic of the SnS-GeS heterostructure with thick GeS vertical layer stack. **(d)** Optical microscopy of an SnS-SnS<sub>2</sub> wrap-around heterostructure, grown from SnS<sub>2</sub> precursor. **(e)** Raman linescan across the SnS-SnS<sub>2</sub> heterostructure (line in (d)). **(f)** Schematic of the SnS-GeS heterostructure with thin GeS vertical stack.

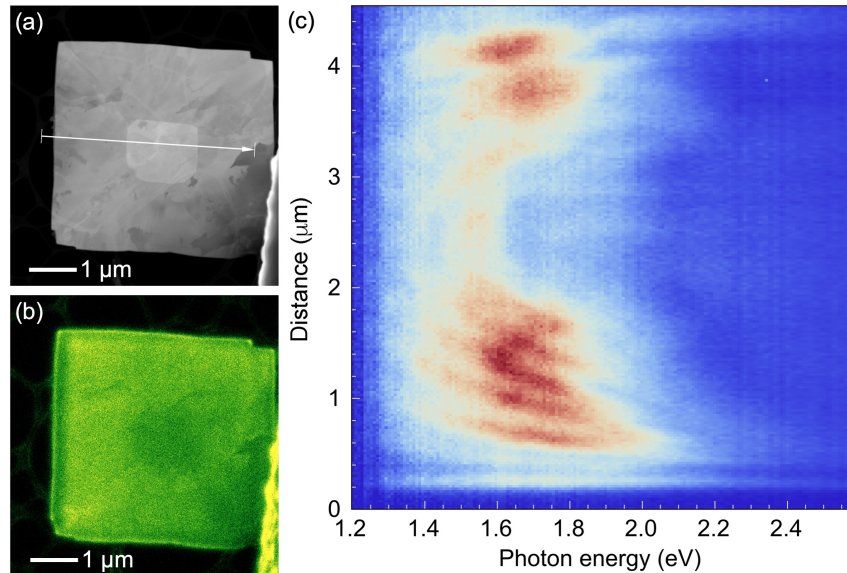

**Supporting Figure 4.** Cathodoluminescence of SnS-GeS lateral heterostructures with small SnS seed crystals and narrow GeS rims. **(a)** HAADF-STEM image of a SnS-GeS heterostructure. **(b)** Panchromatic STEM-CL map of the heterostructure shown in (a). **(c)** Hyperspectral STEM-CL linescan along the line shown in (a), illustrating the fringe pattern due to interference of edge-reflected waveguide modes reaching up to  $\sim 2 \mu\text{m}$  into the interior of the flakes.

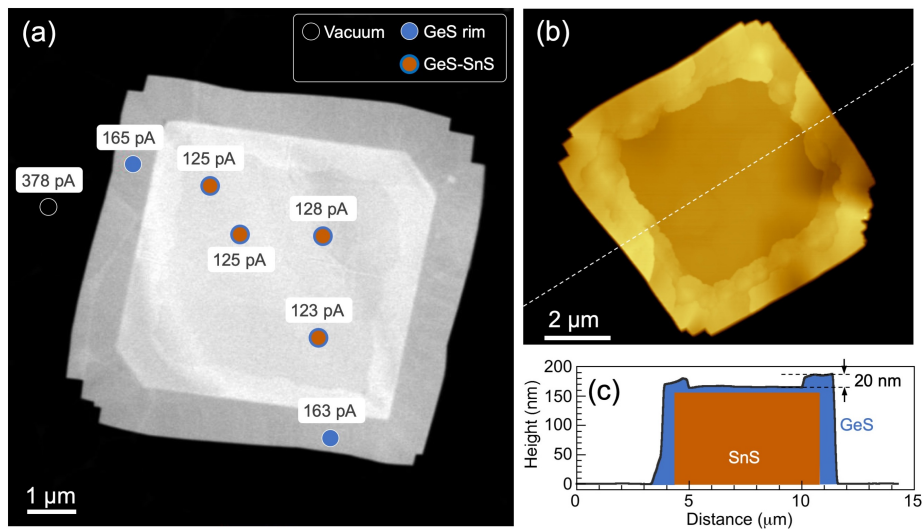

**Supporting Figure 5.** Thickness calibration on SnS-GeS heterostructures based on beam-current attenuation measurements on GeS nanowires (see also Supporting Figure 3). **(a)** HAADF-STEM image of a SnS-GeS heterostructure with local beam-current measurements. The current of the unattenuated electron beam in vacuum is 378 pA, while transit through GeS and SnS causes an attenuation of the measured beam current that scales with the thickness of the flakes. The thickness of the vertical SnS-GeS heterostructure near the center is estimated based on beam-current attenuation measurements in the pure GeS rim and taking into account the morphology of the heterostructures determined by atomic force microscopy (AFM). **(b)** Tapping mode AFM image of a representative SnS-GeS heterostructure. **(c)** Thickness profile extracted along the dashed line in (b). Note the  $\sim 20 \text{ nm}$  elevated thickness due to combined lateral and vertical GeS growth near the edge, leading up to a GeS overlayer thickness that is reduced to a few nm in the central region.

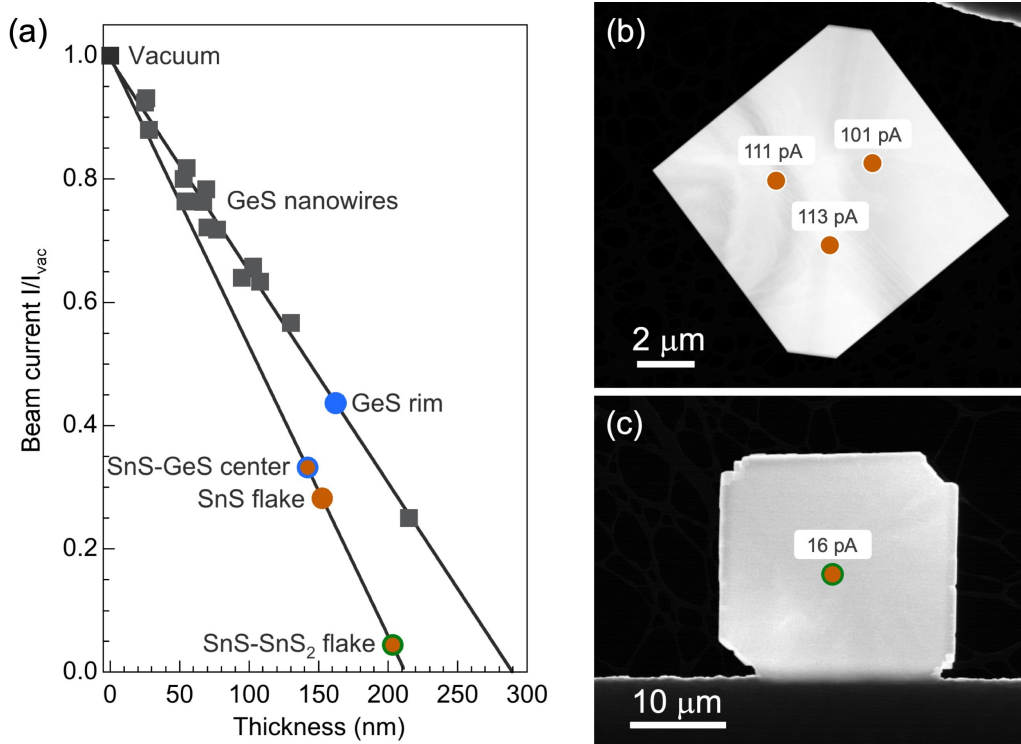

**Supporting Figure 6.** Thickness calibration on SnS-GeS heterostructures based on beam-current attenuation measurements on GeS nanowires. **(a)** Plot of beam-current attenuation measurements on GeS nanowires with different diameters (gray squares) along with beam-current measurements on SnS-GeS heterostructures, pure SnS flakes, and SnS-SnS<sub>2</sub> wrap-around core-shell heterostructures (round symbols). The calibration on nanowires with different diameters allows the measured electron beam current on the pure GeS rim of SnS-GeS heterostructures (see Supporting Figure 2) to be translated into thickness of the rim (162 nm, blue dot). From AFM imaging (see, *e.g.*, Supporting Figure 2 (c)) we find that the rim is typically ~20 nm thicker than the vertical SnS-GeS stack near in the central region. This yields the center thickness of the vertical SnS-GeS heterostructure (142 nm, brown/blue dot) analyzed by STEM-CL (Figure 5 (d)-(f), main text). Since the SnS-GeS vertical stack consists primarily (~95%) of SnS, this also yields a good estimate for the beam-current attenuation of homogeneous SnS flakes and SnS-SnS<sub>2</sub> core-shell heterostructures. Using this calibration, we find that the samples analyzed by STEM-CL have thickness of 152 nm (homogeneous SnS flake, brown dot; see Figure 4, main text) and 203 nm (SnS-SnS<sub>2</sub> core-shell heterostructure, brown/green dot; see Figure 5 (a)-(c), main text), respectively. **(b)** HAADF-STEM image of a homogeneous SnS flake analyzed by STEM-CL with representative beam-current attenuation measurements. **(c)** HAADF-STEM image of an SnS-SnS<sub>2</sub> core-shell heterostructure analyzed by STEM-CL with beam-current attenuation measurement near the center.

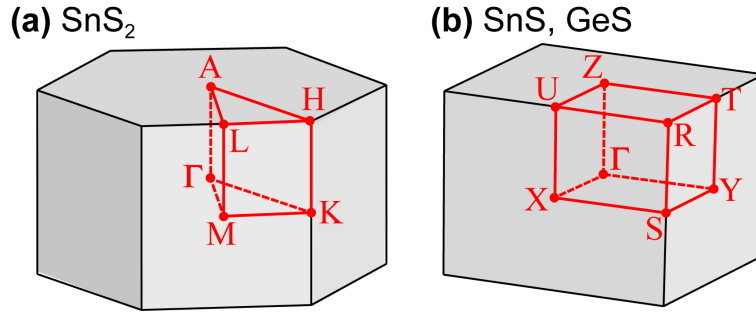

**Supporting Figure 7.** Brillouin zones of (a)  $\text{SnS}_2$  and (b)  $\text{SnS}$ ,  $\text{GeS}$ . High-symmetry points are marked with the same labeling as in the calculated band structures shown in the main text.

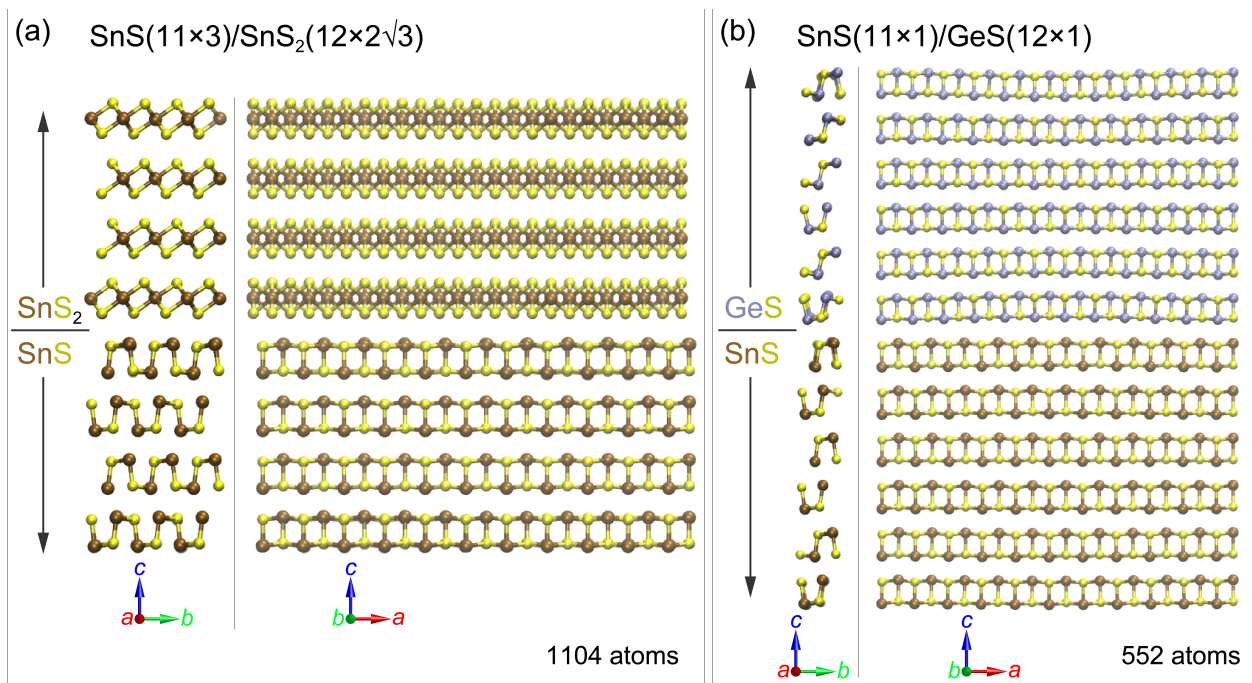

**Supporting Figure 8.** Interface models used to determine the band offsets between (a) ( $\text{SnS}$ ,  $\text{SnS}_2$ ) and (b) ( $\text{SnS}$ ,  $\text{GeS}$ ) in van der Waals heterostructures. Both panels (a) and (b) show side views of the computational cells, seen along the in-plane  $a$ -axis (left) and  $b$ -axis (right), respectively.

## Raw data of plots:

### 1. Figure 4(d)

| Photon energy (eV) | Relative intensity |
|--------------------|--------------------|
| 1.1427             | 0.061798           |
| 1.1499             | 0.2558             |
| 1.1572             | 0.091687           |
| 1.1644             | 0.15731            |
| 1.1716             | 0.071648           |
| 1.1789             | 0.10194            |
| 1.1861             | 0.12968            |
| 1.1933             | 0.32188            |
| 1.2006             | 0.21398            |
| 1.2078             | 0.25196            |
| 1.215              | 0.26045            |
| 1.2223             | 0.38738            |
| 1.2295             | 0.33159            |
| 1.2368             | 0.4284             |
| 1.244              | 0.52205            |
| 1.2512             | 0.53778            |
| 1.2585             | 0.5108             |
| 1.2657             | 0.50749            |
| 1.2729             | 0.6152             |
| 1.2802             | 0.52292            |
| 1.2874             | 0.46423            |
| 1.2946             | 0.61538            |
| 1.3019             | 0.55463            |
| 1.3091             | 0.58588            |
| 1.3164             | 0.67151            |
| 1.3236             | 0.65861            |
| 1.3308             | 0.70181            |
| 1.3381             | 0.73115            |
| 1.3453             | 0.7716             |
| 1.3525             | 0.72656            |
| 1.3598             | 0.73779            |
| 1.367              | 0.82009            |
| 1.3742             | 0.71703            |
| 1.3815             | 0.74117            |
| 1.3887             | 0.73781            |
| 1.396              | 0.7789             |
| 1.4032             | 0.77473            |

|        |         |
|--------|---------|
| 1.4104 | 0.72586 |
| 1.4177 | 0.65636 |
| 1.4249 | 0.58238 |
| 1.4321 | 0.65747 |
| 1.4394 | 0.66753 |
| 1.4466 | 0.64833 |
| 1.4539 | 0.5737  |
| 1.4611 | 0.56696 |
| 1.4683 | 0.61946 |
| 1.4756 | 0.53903 |
| 1.4828 | 0.40362 |
| 1.49   | 0.38619 |
| 1.4973 | 0.39993 |
| 1.5045 | 0.33244 |
| 1.5117 | 0.41504 |
| 1.519  | 0.40955 |
| 1.5262 | 0.35831 |
| 1.5335 | 0.34484 |
| 1.5407 | 0.36569 |
| 1.5479 | 0.36819 |
| 1.5552 | 0.3711  |
| 1.5624 | 0.43221 |
| 1.5696 | 0.45229 |
| 1.5769 | 0.47334 |
| 1.5841 | 0.46503 |
| 1.5913 | 0.51372 |
| 1.5986 | 0.53344 |
| 1.6058 | 0.57307 |
| 1.6131 | 0.58945 |
| 1.6203 | 0.65567 |
| 1.6275 | 0.64733 |
| 1.6348 | 0.63163 |
| 1.642  | 0.62911 |
| 1.6492 | 0.656   |
| 1.6565 | 0.69032 |
| 1.6637 | 0.68919 |
| 1.6709 | 0.74474 |
| 1.6782 | 0.73301 |
| 1.6854 | 0.78066 |
| 1.6927 | 0.77646 |

|        |         |
|--------|---------|
| 1.6999 | 0.78624 |
| 1.7071 | 0.85042 |
| 1.7144 | 0.89429 |
| 1.7216 | 0.90607 |
| 1.7288 | 0.89999 |
| 1.7361 | 0.84858 |
| 1.7433 | 0.92819 |
| 1.7505 | 0.92515 |
| 1.7578 | 0.93682 |
| 1.765  | 0.92654 |
| 1.7723 | 0.94289 |
| 1.7795 | 0.98472 |
| 1.7867 | 1       |
| 1.794  | 0.92205 |
| 1.8012 | 0.88938 |
| 1.8084 | 0.92088 |
| 1.8157 | 0.9255  |
| 1.8229 | 0.8923  |
| 1.8302 | 0.85471 |
| 1.8374 | 0.9195  |
| 1.8446 | 0.90571 |
| 1.8519 | 0.90225 |
| 1.8591 | 0.90027 |
| 1.8663 | 0.87792 |
| 1.8736 | 0.85719 |
| 1.8808 | 0.83713 |
| 1.888  | 0.82732 |
| 1.8953 | 0.83256 |
| 1.9025 | 0.85376 |
| 1.9098 | 0.86672 |
| 1.917  | 0.86562 |
| 1.9242 | 0.84661 |
| 1.9315 | 0.81899 |
| 1.9387 | 0.80294 |
| 1.9459 | 0.79151 |
| 1.9532 | 0.77134 |
| 1.9604 | 0.74304 |
| 1.9676 | 0.7784  |
| 1.9749 | 0.78718 |
| 1.9821 | 0.73822 |



|        |         |
|--------|---------|
| 1.9894 | 0.74451 |
| 1.9966 | 0.73663 |
| 2.0038 | 0.73011 |
| 2.0111 | 0.73886 |
| 2.0183 | 0.75961 |
| 2.0255 | 0.75489 |
| 2.0328 | 0.7425  |
| 2.04   | 0.72163 |
| 2.0472 | 0.71349 |
| 2.0545 | 0.70117 |
| 2.0617 | 0.67774 |
| 2.069  | 0.65378 |
| 2.0762 | 0.63627 |
| 2.0834 | 0.65223 |
| 2.0907 | 0.65415 |
| 2.0979 | 0.6447  |
| 2.1051 | 0.64988 |
| 2.1124 | 0.64387 |
| 2.1196 | 0.60342 |
| 2.1269 | 0.61655 |
| 2.1341 | 0.66522 |
| 2.1413 | 0.62637 |
| 2.1486 | 0.58632 |
| 2.1558 | 0.57568 |
| 2.163  | 0.5838  |
| 2.1703 | 0.61252 |
| 2.1775 | 0.5972  |
| 2.1847 | 0.56555 |
| 2.192  | 0.56142 |
| 2.1992 | 0.55586 |
| 2.2065 | 0.53646 |

## 2. Figure 7(c)

| Photon energy (eV) | Relative intensity |
|--------------------|--------------------|
| 1.1427             | -0.047341          |
| 1.1499             | 0.033223           |
| 1.1572             | 0.073834           |
| 1.1644             | 0.086              |
| 1.1716             | -0.029042          |
| 1.1789             | 0.014671           |
| 1.1861             | 0.11108            |

|        |         |
|--------|---------|
| 1.1933 | 0.1644  |
| 1.2006 | 0.23897 |
| 1.2078 | 0.21126 |
| 1.215  | 0.29738 |
| 1.2223 | 0.2061  |
| 1.2295 | 0.27461 |
| 1.2368 | 0.3583  |
| 1.244  | 0.36944 |
| 1.2512 | 0.46401 |
| 1.2585 | 0.60892 |
| 1.2657 | 0.47408 |
| 1.2729 | 0.52955 |
| 1.2802 | 0.65511 |
| 1.2874 | 0.68935 |
| 1.2946 | 0.7348  |
| 1.3019 | 0.67492 |
| 1.3091 | 0.70517 |
| 1.3164 | 0.70059 |
| 1.3236 | 0.75827 |
| 1.3308 | 0.74192 |
| 1.3381 | 0.78119 |
| 1.3453 | 0.813   |
| 1.3525 | 0.82054 |
| 1.3598 | 0.76725 |
| 1.367  | 0.9139  |
| 1.3742 | 0.87953 |
| 1.3815 | 0.92529 |
| 1.3887 | 1       |
| 1.396  | 0.99338 |
| 1.4032 | 0.90335 |
| 1.4104 | 0.9419  |
| 1.4177 | 0.8659  |
| 1.4249 | 0.87837 |
| 1.4321 | 0.78262 |
| 1.4394 | 0.84432 |
| 1.4466 | 0.76421 |
| 1.4539 | 0.75536 |
| 1.4611 | 0.70085 |
| 1.4683 | 0.66376 |
| 1.4756 | 0.65928 |

|        |         |
|--------|---------|
| 1.4828 | 0.53333 |
| 1.49   | 0.58668 |
| 1.4973 | 0.57047 |
| 1.5045 | 0.60379 |
| 1.5117 | 0.6014  |
| 1.519  | 0.62675 |
| 1.5262 | 0.63881 |
| 1.5335 | 0.75512 |
| 1.5407 | 0.69031 |
| 1.5479 | 0.73269 |
| 1.5552 | 0.76088 |
| 1.5624 | 0.72652 |
| 1.5696 | 0.72362 |
| 1.5769 | 0.74088 |
| 1.5841 | 0.78041 |
| 1.5913 | 0.81804 |
| 1.5986 | 0.80307 |
| 1.6058 | 0.8054  |
| 1.6131 | 0.78357 |
| 1.6203 | 0.75931 |
| 1.6275 | 0.78999 |
| 1.6348 | 0.78218 |
| 1.642  | 0.89213 |
| 1.6492 | 0.85758 |
| 1.6565 | 0.83051 |
| 1.6637 | 0.86113 |
| 1.6709 | 0.8511  |
| 1.6782 | 0.84936 |
| 1.6854 | 0.87631 |
| 1.6927 | 0.86336 |
| 1.6999 | 0.89852 |
| 1.7071 | 0.87931 |
| 1.7144 | 0.86436 |
| 1.7216 | 0.91667 |
| 1.7288 | 0.95504 |
| 1.7361 | 0.93114 |
| 1.7433 | 0.91398 |
| 1.7505 | 0.92353 |
| 1.7578 | 0.93473 |
| 1.765  | 0.94071 |

|        |         |
|--------|---------|
| 1.7723 | 0.90277 |
| 1.7795 | 0.8633  |
| 1.7867 | 0.85885 |
| 1.794  | 0.86171 |
| 1.8012 | 0.86721 |
| 1.8084 | 0.94311 |
| 1.8157 | 0.87379 |
| 1.8229 | 0.88714 |
| 1.8302 | 0.90643 |
| 1.8374 | 0.79093 |
| 1.8446 | 0.79959 |
| 1.8519 | 0.82985 |
| 1.8591 | 0.84    |
| 1.8663 | 0.80544 |
| 1.8736 | 0.78427 |
| 1.8808 | 0.79167 |
| 1.888  | 0.76542 |
| 1.8953 | 0.78935 |
| 1.9025 | 0.8328  |
| 1.9098 | 0.80244 |
| 1.917  | 0.77637 |
| 1.9242 | 0.75339 |
| 1.9315 | 0.7465  |
| 1.9387 | 0.68275 |
| 1.9459 | 0.62299 |
| 1.9532 | 0.70196 |
| 1.9604 | 0.74084 |
| 1.9676 | 0.74985 |
| 1.9749 | 0.72523 |
| 1.9821 | 0.72211 |
| 1.9894 | 0.71397 |
| 1.9966 | 0.69757 |
| 2.0038 | 0.6877  |
| 2.0111 | 0.6872  |
| 2.0183 | 0.69642 |
| 2.0255 | 0.696   |
| 2.0328 | 0.69087 |
| 2.04   | 0.68027 |
| 2.0472 | 0.682   |
| 2.0545 | 0.68327 |

|        |         |
|--------|---------|
| 2.0617 | 0.6809  |
| 2.069  | 0.64449 |
| 2.0762 | 0.61121 |
| 2.0834 | 0.6486  |
| 2.0907 | 0.65206 |
| 2.0979 | 0.62801 |
| 2.1051 | 0.61336 |
| 2.1124 | 0.60943 |
| 2.1196 | 0.6323  |
| 2.1269 | 0.68016 |
| 2.1341 | 0.74432 |
| 2.1413 | 0.63935 |
| 2.1486 | 0.55008 |
| 2.1558 | 0.58815 |
| 2.163  | 0.61029 |
| 2.1703 | 0.61502 |
| 2.1775 | 0.58437 |
| 2.1847 | 0.54084 |
| 2.192  | 0.54309 |
| 2.1992 | 0.54846 |
| 2.2065 | 0.55879 |

### 3. Figure 7(f)

| Photon energy (eV) | Relative intensity |
|--------------------|--------------------|
| 1.1973             | 0.26205            |
| 1.2057             | 0.43349            |
| 1.2141             | 0.51351            |
| 1.2225             | 0.76092            |
| 1.2309             | 0.86877            |
| 1.2393             | 1.036              |
| 1.2477             | 1.3507             |
| 1.2561             | 1.5563             |
| 1.2645             | 1.8023             |
| 1.2729             | 2.0187             |
| 1.2813             | 2.0727             |
| 1.2896             | 2.2519             |
| 1.298              | 2.338              |
| 1.3064             | 2.351              |
| 1.3148             | 2.265              |
| 1.3232             | 2.1533             |
| 1.3316             | 2.1664             |

|        |        |
|--------|--------|
| 1.34   | 2.1371 |
| 1.3484 | 2.0095 |
| 1.3568 | 1.9685 |
| 1.3652 | 2.0529 |
| 1.3736 | 2.0568 |
| 1.382  | 1.9586 |
| 1.3903 | 2.0086 |
| 1.3987 | 2.0717 |
| 1.4071 | 2.06   |
| 1.4155 | 2.0357 |
| 1.4239 | 2.041  |
| 1.4323 | 1.9867 |
| 1.4407 | 2.0827 |
| 1.4491 | 1.9572 |
| 1.4575 | 1.9591 |
| 1.4659 | 1.9138 |
| 1.4743 | 1.8717 |
| 1.4827 | 1.8608 |
| 1.4911 | 1.7416 |
| 1.4995 | 1.7229 |
| 1.5078 | 1.6602 |
| 1.5162 | 1.649  |
| 1.5246 | 1.5974 |
| 1.533  | 1.531  |
| 1.5414 | 1.5149 |
| 1.5498 | 1.511  |
| 1.5582 | 1.5798 |
| 1.5666 | 1.4387 |
| 1.575  | 1.5158 |
| 1.5834 | 1.4526 |
| 1.5918 | 1.4815 |
| 1.6002 | 1.5229 |
| 1.6086 | 1.5031 |
| 1.6169 | 1.473  |
| 1.6253 | 1.509  |
| 1.6337 | 1.5578 |
| 1.6421 | 1.4557 |
| 1.6505 | 1.5011 |
| 1.6589 | 1.5473 |
| 1.6673 | 1.5779 |

|        |        |
|--------|--------|
| 1.6757 | 1.5472 |
| 1.6841 | 1.5212 |
| 1.6925 | 1.5129 |
| 1.7009 | 1.4825 |
| 1.7093 | 1.4582 |
| 1.7177 | 1.4951 |
| 1.726  | 1.4525 |
| 1.7344 | 1.429  |
| 1.7428 | 1.4411 |
| 1.7512 | 1.3926 |
| 1.7596 | 1.3836 |
| 1.768  | 1.3132 |
| 1.7764 | 1.3468 |
| 1.7848 | 1.3318 |
| 1.7932 | 1.2695 |
| 1.8016 | 1.3458 |
| 1.81   | 1.2573 |
| 1.8184 | 1.2569 |
| 1.8268 | 1.2561 |
| 1.8351 | 1.2774 |
| 1.8435 | 1.2666 |
| 1.8519 | 1.2526 |
| 1.8603 | 1.2254 |
| 1.8687 | 1.2157 |
| 1.8771 | 1.2223 |
| 1.8855 | 1.1496 |
| 1.8939 | 1.235  |
| 1.9023 | 1.1907 |
| 1.9107 | 1.1831 |
| 1.9191 | 1.1751 |
| 1.9275 | 1.1794 |
| 1.9359 | 1.2055 |
| 1.9442 | 1.2335 |
| 1.9526 | 1.2367 |
| 1.961  | 1.2165 |
| 1.9694 | 1.2122 |
| 1.9778 | 1.2247 |
| 1.9862 | 1.2395 |
| 1.9946 | 1.2344 |
| 2.003  | 1.2291 |

|        |        |
|--------|--------|
| 2.0114 | 1.228  |
| 2.0198 | 1.2369 |
| 2.0282 | 1.2702 |
| 2.0366 | 1.2612 |
| 2.045  | 1.2542 |
| 2.0533 | 1.2532 |
| 2.0617 | 1.2482 |
| 2.0701 | 1.2479 |
| 2.0785 | 1.2503 |
| 2.0869 | 1.2553 |
| 2.0953 | 1.2721 |
| 2.1037 | 1.2614 |
| 2.1121 | 1.2382 |
| 2.1205 | 1.2247 |
| 2.1289 | 1.2328 |
| 2.1373 | 1.2429 |
| 2.1457 | 1.2439 |
| 2.1541 | 1.2357 |
| 2.1624 | 1.225  |
| 2.1708 | 1.2127 |
| 2.1792 | 1.2193 |
| 2.1876 | 1.2309 |
| 2.196  | 1.2456 |
| 2.2044 | 1.243  |

#### 4. Supporting Figure 1(e)

| Raman shift (cm <sup>-1</sup> ) | Intensity (arb. units) |
|---------------------------------|------------------------|
| 220.2                           | 115.54                 |
| 220.88                          | 110.07                 |
| 221.56                          | 109.88                 |
| 222.25                          | 104.9                  |
| 222.93                          | 102.37                 |
| 223.61                          | 99.585                 |
| 224.3                           | 99.39                  |
| 224.98                          | 98.659                 |
| 225.66                          | 95.195                 |
| 226.35                          | 92.415                 |
| 227.03                          | 91.732                 |
| 227.71                          | 90.415                 |
| 228.39                          | 90.561                 |
| 229.07                          | 89.39                  |



|        |        |
|--------|--------|
| 229.76 | 87.585 |
| 230.44 | 87.878 |
| 231.12 | 87.439 |
| 231.8  | 85.244 |
| 232.49 | 85.341 |
| 233.17 | 83.537 |
| 233.85 | 83.683 |
| 234.53 | 84.415 |
| 235.21 | 83.439 |
| 235.89 | 83.683 |
| 236.57 | 83.732 |
| 237.26 | 82.366 |
| 237.94 | 82.561 |
| 238.62 | 81.634 |
| 239.3  | 83.732 |
| 239.98 | 81.39  |
| 240.66 | 81.195 |
| 241.34 | 81.781 |
| 242.02 | 81.244 |
| 242.7  | 81.39  |
| 243.38 | 81.049 |
| 244.06 | 80.415 |
| 244.74 | 81.927 |
| 245.42 | 81.488 |
| 246.1  | 79.976 |
| 246.78 | 82.073 |
| 247.46 | 79.683 |
| 248.14 | 81.341 |
| 248.82 | 81.878 |
| 249.5  | 82.854 |
| 250.18 | 82.805 |
| 250.85 | 80.659 |
| 251.53 | 80.707 |
| 252.21 | 81.049 |
| 252.89 | 82.463 |
| 253.57 | 81.049 |
| 254.25 | 80.854 |
| 254.93 | 81.049 |
| 255.6  | 79.976 |
| 256.28 | 80.463 |

|        |        |
|--------|--------|
| 256.96 | 79.927 |
| 257.64 | 80.317 |
| 258.32 | 78.073 |
| 258.99 | 79.244 |
| 259.67 | 77.878 |
| 260.35 | 77.537 |
| 261.03 | 77.341 |
| 261.7  | 75.976 |
| 262.38 | 77.439 |
| 263.06 | 76.902 |
| 263.74 | 74.951 |
| 264.41 | 76.561 |
| 265.09 | 75.439 |
| 265.77 | 72.805 |
| 266.44 | 72.61  |
| 267.12 | 71.976 |
| 267.8  | 69.878 |
| 268.47 | 70.561 |
| 269.15 | 70.415 |
| 269.82 | 70.171 |
| 270.5  | 69.439 |
| 271.17 | 68.902 |
| 271.85 | 68.561 |
| 272.53 | 67.195 |
| 273.2  | 67.683 |
| 273.88 | 67.537 |
| 274.55 | 68.805 |
| 275.23 | 68.171 |
| 275.9  | 67.585 |
| 276.58 | 65.927 |
| 277.25 | 65.927 |
| 277.93 | 65.049 |
| 278.6  | 65.976 |
| 279.28 | 64.854 |
| 279.95 | 66.317 |
| 280.63 | 65.878 |
| 281.3  | 64.073 |
| 281.98 | 64.415 |
| 282.65 | 63.537 |
| 283.32 | 63.488 |

|        |        |
|--------|--------|
| 284    | 64.122 |
| 284.67 | 63.878 |
| 285.35 | 63.146 |
| 286.02 | 63.732 |
| 286.69 | 62.707 |
| 287.36 | 63.195 |
| 288.04 | 62.22  |
| 288.71 | 60.951 |
| 289.39 | 62.951 |
| 290.06 | 62.024 |
| 290.73 | 59.732 |
| 291.4  | 60.61  |
| 292.08 | 60.171 |
| 292.75 | 62.707 |
| 293.42 | 61.293 |
| 294.09 | 59.537 |
| 294.77 | 62.317 |
| 295.44 | 59.976 |
| 296.11 | 62.268 |
| 296.78 | 61.488 |
| 297.45 | 62.366 |
| 298.13 | 60.512 |
| 298.8  | 61.488 |
| 299.47 | 59.927 |
| 300.14 | 58.659 |
| 300.81 | 61.049 |
| 301.48 | 59.244 |
| 302.15 | 60.561 |
| 302.82 | 58.561 |
| 303.5  | 60.171 |
| 304.17 | 60.171 |
| 304.84 | 59     |
| 305.51 | 59.927 |
| 306.18 | 58.122 |
| 306.85 | 57.976 |
| 307.52 | 57.244 |
| 308.19 | 58.024 |
| 308.86 | 58.512 |
| 309.53 | 57.146 |
| 310.2  | 57.195 |

|        |        |
|--------|--------|
| 310.87 | 59.146 |
| 311.54 | 55.537 |
| 312.21 | 56.024 |
| 312.88 | 55.195 |
| 313.55 | 55.293 |
| 314.21 | 53.976 |
| 314.88 | 53.244 |
| 315.55 | 55.439 |
| 316.22 | 53.829 |
| 316.89 | 53.829 |
| 317.56 | 55.146 |
| 318.23 | 54.805 |
| 318.9  | 51.683 |
| 319.57 | 53.78  |
| 320.23 | 52.366 |
| 320.9  | 51.732 |
| 321.57 | 50.317 |
| 322.24 | 50.61  |
| 322.91 | 50.463 |
| 323.57 | 49.927 |
| 324.24 | 50.415 |
| 324.91 | 49.683 |
| 325.58 | 50.171 |
| 326.24 | 51.098 |
| 326.91 | 49.829 |
| 327.58 | 48.805 |
| 328.25 | 50.171 |
| 328.91 | 50.024 |
| 329.58 | 46.073 |
| 330.25 | 46.561 |
| 330.91 | 49.537 |
| 331.58 | 48.171 |
| 332.25 | 46.805 |
| 332.91 | 47.293 |
| 333.58 | 47.878 |
| 334.24 | 47.195 |
| 334.91 | 48.61  |
| 335.58 | 46.659 |
| 336.24 | 46.659 |
| 336.91 | 46.561 |

|        |        |
|--------|--------|
| 337.57 | 46.024 |
| 338.24 | 45.195 |
| 338.9  | 46.22  |
| 339.57 | 46.512 |
| 340.24 | 45.244 |
| 340.9  | 46.171 |
| 341.57 | 46.024 |
| 342.23 | 45.78  |
| 342.89 | 46.024 |
| 343.56 | 45.878 |
| 344.23 | 46.61  |
| 344.89 | 45.634 |
| 345.55 | 46.268 |
| 346.22 | 45.293 |
| 346.88 | 44.171 |
| 347.55 | 44.707 |
| 348.21 | 44.805 |
| 348.87 | 43.732 |
| 349.54 | 44.463 |
| 350.2  | 45.39  |
| 350.86 | 45.829 |

### 5. Supporting Figure1 (f)

| Raman shift (cm <sup>-1</sup> ) | Intensity (arb. units) |
|---------------------------------|------------------------|
| 220.2                           | 26.31                  |
| 220.88                          | 21.199                 |
| 221.56                          | 21.353                 |
| 222.25                          | 16.727                 |
| 222.93                          | 14.538                 |
| 223.61                          | 12.103                 |
| 224.3                           | 12.253                 |
| 224.98                          | 11.865                 |
| 225.66                          | 8.7441                 |
| 226.35                          | 6.304                  |
| 227.03                          | 5.9602                 |
| 227.71                          | 4.9819                 |
| 228.39                          | 5.4648                 |
| 229.07                          | 4.6292                 |
| 229.76                          | 3.1584                 |
| 230.44                          | 3.7847                 |
| 231.12                          | 3.6765                 |

|        |        |
|--------|--------|
| 231.8  | 1.8115 |
| 232.49 | 2.2375 |
| 233.17 | 0.7602 |
| 233.85 | 1.2324 |
| 234.53 | 2.2892 |
| 235.21 | 1.637  |
| 235.89 | 2.203  |
| 236.57 | 2.5732 |
| 237.26 | 1.5271 |
| 237.94 | 2.0406 |
| 238.62 | 1.431  |
| 239.3  | 3.8446 |
| 239.98 | 1.8179 |
| 240.66 | 1.9356 |
| 241.34 | 2.8334 |
| 242.02 | 2.608  |
| 242.7  | 3.0639 |
| 243.38 | 3.0305 |
| 244.06 | 2.7039 |
| 244.74 | 4.5222 |
| 245.42 | 4.3877 |
| 246.1  | 3.1792 |
| 246.78 | 5.5789 |
| 247.46 | 3.49   |
| 248.14 | 5.4494 |
| 248.82 | 6.2842 |
| 249.5  | 7.5578 |
| 250.18 | 7.805  |
| 250.85 | 5.9534 |
| 251.53 | 6.2968 |
| 252.21 | 6.9309 |
| 252.89 | 8.6383 |
| 253.57 | 7.5137 |
| 254.25 | 7.6078 |
| 254.93 | 8.0911 |
| 255.6  | 7.3058 |
| 256.28 | 8.0796 |
| 256.96 | 7.8275 |
| 257.64 | 8.5016 |
| 258.32 | 6.54   |

|        |        |
|--------|--------|
| 258.99 | 7.9924 |
| 259.67 | 6.9076 |
| 260.35 | 6.8456 |
| 261.03 | 6.9286 |
| 261.7  | 5.8397 |
| 262.38 | 7.5794 |
| 263.06 | 7.3177 |
| 263.74 | 5.6403 |
| 264.41 | 7.5221 |
| 265.09 | 6.6719 |
| 265.77 | 4.3085 |
| 266.44 | 4.3831 |
| 267.12 | 4.0176 |
| 267.8  | 2.1878 |
| 268.47 | 3.1366 |
| 269.15 | 3.2554 |
| 269.82 | 3.2761 |
| 270.5  | 2.8073 |
| 271.17 | 2.5329 |
| 271.85 | 2.4532 |
| 272.53 | 1.3467 |
| 273.2  | 2.0942 |
| 273.88 | 2.2054 |
| 274.55 | 3.731  |
| 275.23 | 3.3528 |
| 275.9  | 3.0228 |
| 276.58 | 1.6179 |
| 277.25 | 1.8713 |
| 277.93 | 1.245  |
| 278.6  | 2.4233 |
| 279.28 | 1.5513 |
| 279.95 | 3.2635 |
| 280.63 | 3.0725 |
| 281.3  | 1.5153 |
| 281.98 | 2.1024 |
| 282.65 | 1.4695 |
| 283.32 | 1.6649 |
| 284    | 2.5426 |
| 284.67 | 2.5411 |
| 285.35 | 2.0505 |

|        |         |
|--------|---------|
| 286.02 | 2.8764  |
| 286.69 | 2.0913  |
| 287.36 | 2.8174  |
| 288.04 | 2.0796  |
| 288.71 | 1.0479  |
| 289.39 | 3.2836  |
| 290.06 | 2.5915  |
| 290.73 | 0.53273 |
| 291.4  | 1.6438  |
| 292.08 | 1.4362  |
| 292.75 | 4.204   |
| 293.42 | 3.0198  |
| 294.09 | 1.4932  |
| 294.77 | 4.5017  |
| 295.44 | 2.388   |
| 296.11 | 4.9073  |
| 296.78 | 4.3522  |
| 297.45 | 5.4551  |
| 298.13 | 3.8258  |
| 298.8  | 5.0239  |
| 299.47 | 3.6856  |
| 300.14 | 2.6382  |
| 300.81 | 5.2491  |
| 301.48 | 3.6637  |
| 302.15 | 5.1999  |
| 302.82 | 3.4174  |
| 303.5  | 5.2445  |
| 304.17 | 5.4604  |
| 304.84 | 4.5048  |
| 305.51 | 5.6465  |
| 306.18 | 4.0552  |
| 306.85 | 4.1215  |
| 307.52 | 3.6016  |
| 308.19 | 4.5938  |
| 308.86 | 5.2916  |
| 309.53 | 4.1352  |
| 310.2  | 4.3924  |
| 310.87 | 6.5515  |
| 311.54 | 3.1486  |
| 312.21 | 3.8428  |



|        |         |
|--------|---------|
| 312.88 | 3.2188  |
| 313.55 | 3.5212  |
| 314.21 | 2.4079  |
| 314.88 | 1.8791  |
| 315.55 | 4.2764  |
| 316.22 | 2.8685  |
| 316.89 | 3.0692  |
| 317.56 | 4.5861  |
| 318.23 | 4.4439  |
| 318.9  | 1.5198  |
| 319.57 | 3.8148  |
| 320.23 | 2.5972  |
| 320.9  | 2.1592  |
| 321.57 | 0.93949 |
| 322.24 | 1.4269  |
| 322.91 | 1.4743  |
| 323.57 | 1.1304  |
| 324.24 | 1.8105  |
| 324.91 | 1.2701  |
| 325.58 | 1.9487  |
| 326.24 | 3.0655  |
| 326.91 | 1.9866  |
| 327.58 | 1.1503  |
| 328.25 | 2.7041  |
| 328.91 | 2.7449  |
| 329.58 | -1.0203 |
| 330.25 | -0.3466 |
| 330.91 | 2.8136  |
| 331.58 | 1.6317  |
| 332.25 | 0.44974 |
| 332.91 | 1.1201  |
| 333.58 | 1.8873  |
| 334.24 | 1.3854  |
| 334.91 | 2.9806  |
| 335.58 | 1.2092  |
| 336.24 | 1.3887  |
| 336.91 | 1.4697  |
| 337.57 | 1.1107  |
| 338.24 | 0.4586  |
| 338.9  | 1.6593  |

|        |        |
|--------|--------|
| 339.57 | 2.1279 |
| 340.24 | 1.0345 |
| 340.9  | 2.1351 |
| 341.57 | 2.1627 |
| 342.23 | 2.0918 |
| 342.89 | 2.5081 |
| 343.56 | 2.5334 |
| 344.23 | 3.4363 |
| 344.89 | 2.6305 |
| 345.55 | 3.4345 |
| 346.22 | 2.6281 |
| 346.88 | 1.6741 |
| 347.55 | 2.3784 |
| 348.21 | 2.6433 |
| 348.87 | 1.7362 |
| 349.54 | 2.6337 |
| 350.2  | 3.7255 |
| 350.86 | 4.3294 |

## 6. Supporting Figure6 (a)

| Sample       | Known thickness (nm) | Relative beam current |
|--------------|----------------------|-----------------------|
| Vacuum       | 0                    | 1.00                  |
| GeS nanowire | 55                   | 0.82                  |
| GeS nanowire | 28                   | 0.88                  |
| GeS nanowire | 69                   | 0.78                  |
| GeS nanowire | 26                   | 0.93                  |
| GeS nanowire | 54                   | 0.76                  |
| GeS nanowire | 77                   | 0.72                  |
| GeS nanowire | 25                   | 0.92                  |
| GeS nanowire | 70                   | 0.72                  |
| GeS nanowire | 108                  | 0.63                  |
| GeS nanowire | 130                  | 0.57                  |
| GeS nanowire | 95                   | 0.64                  |
| GeS nanowire | 53                   | 0.80                  |
| GeS nanowire | 103                  | 0.66                  |

| Sample         | Inferred thickness (nm) | Relative beam current |
|----------------|-------------------------|-----------------------|
| GeS rim        | 162.3                   | 0.44                  |
| SnS-GeS center | 142.3                   | 0.33                  |
| SnS flake      | 152.7                   | 0.28                  |
| SnS-SnS2 flake | 203.5                   | 0.04                  |
